# Supplementary material for: Genomic determinants of Furin cleavage in diverse European SARS-related bat coronaviruses
Source: bioRxiv or medRxiv preprint supplement (doi:10.1101/2021.12.15.472779), 2021-12-15
Supplement: Supplementary file [file media-1.pdf]

Genomic determinants of Furin cleavage in diverse European SARS-related bat coronaviruses

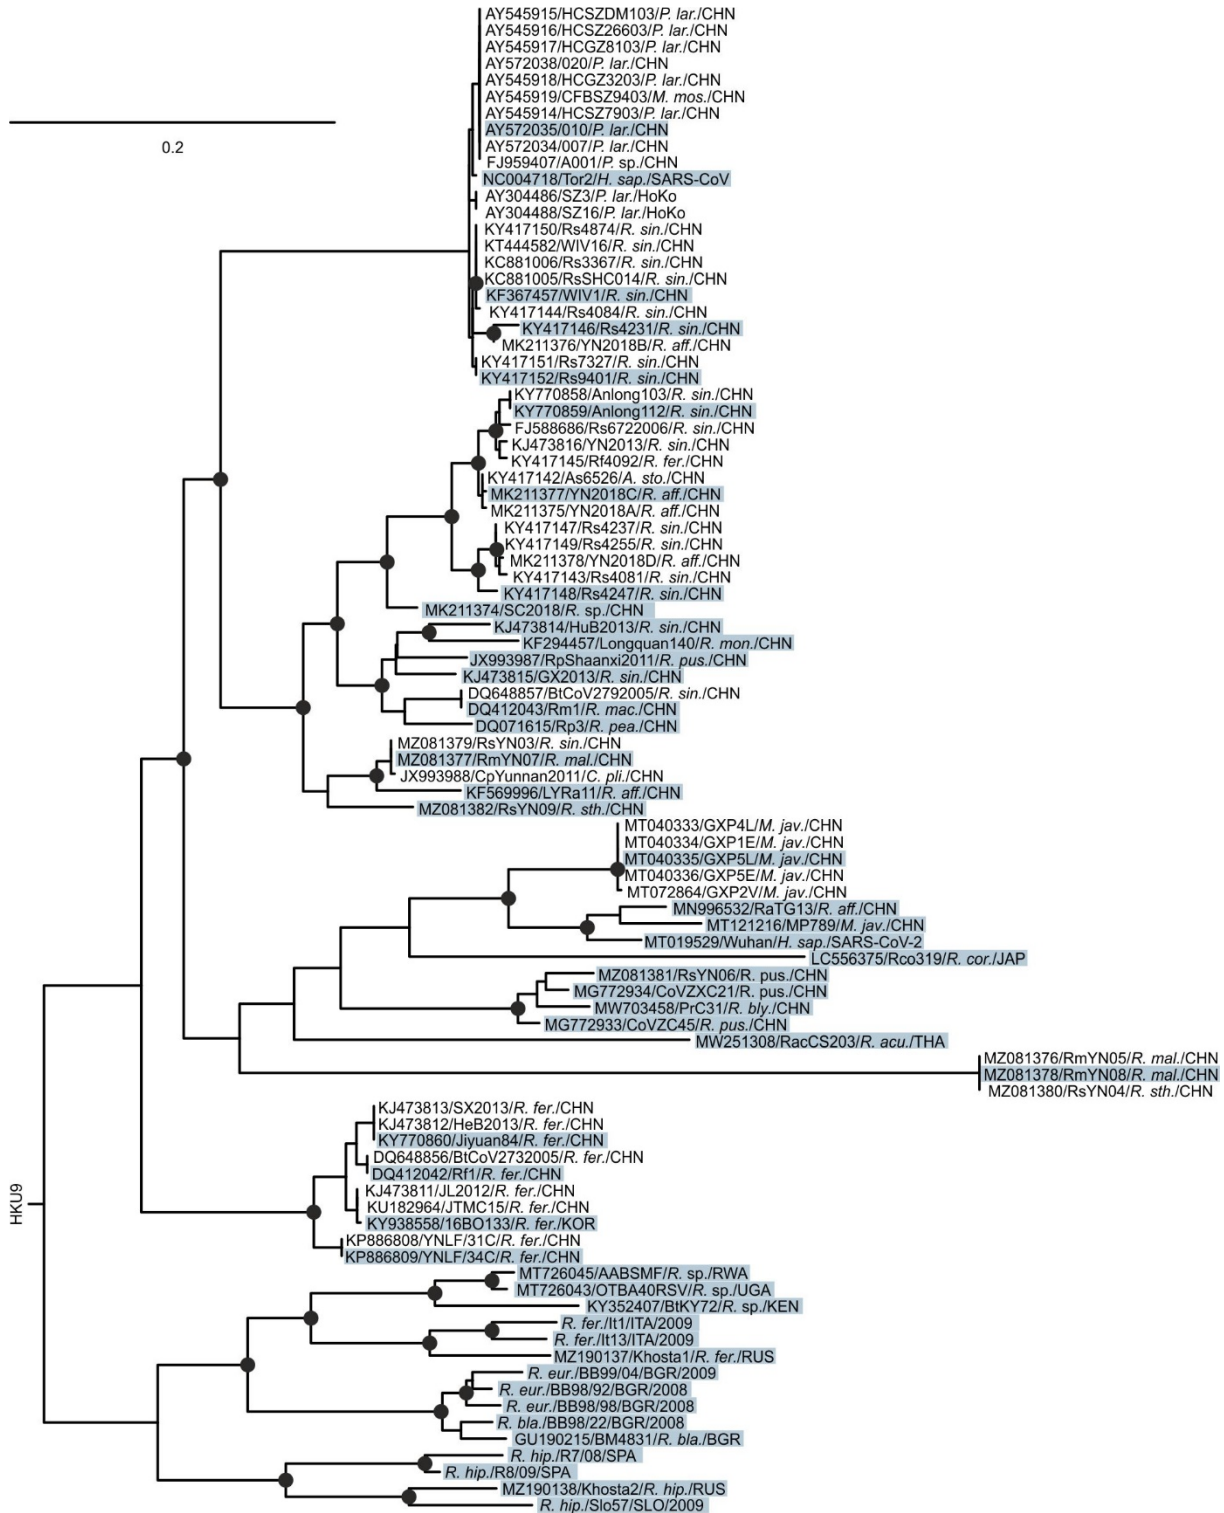

Supplementary Figure 1. ML phylogeny showing the complete diversity of members of the species SARS-related Coronavirus (SrC). The final dataset comprised 91 sequences (2 human, 12 civet, 6

pangolin and 71 bat-associated *SrC*). Sequences are named as followed: GenBank Acc. number/strain name/host species/country of detection. Circles at nodes indicate support of grouping in  $\geq 90\%$  of 1,000 bootstrap replicates. Scale bar represents nucleotide substitutions per site. Sequences highlighted in blue were chosen for phylogenetic analysis shown in Figure panel A, representing the complete diversity of *SrC*. *A. sto.*, *Aselliscus stoliczkanus*; *C. pli.*, *Chaerephon plicatus*; *H. sap.*, *Homo sapiens*; *M. jav.*, *Manis javanica*; *M. mos.*, *Melogale moschata*; *P. lar.*, *Paguma larvata*; *P. sp.*; *Paguma* species; *R. acu.*, *Rhinolophus acuminatus*; *R. aff.*, *Rhinolophus affinus*; *R. bla.*, *Rhinolophus blasii*; *R. bly.*, *Rhinolophus blythi*; *R. cor.*, *Rhinolophus cornutus*; *R. eur.*, *Rhinolophus euryale*; *R. fer.*, *Rhinolophus ferrumequinum*; *R. hip.*, *Rhinolophus hipposideros*; *R. mac.*, *Rhinolophus macrotis*; *R. mal.*, *Rhinolophus malayanus*; *R. mon.*, *Rhinolophus monoceros*; *R. pea.*, *Rhinolophus pearsonii*; *R. pus.*, *Rhinolophus pusillus*; *R. sin.*, *Rhinolophus sinicus*; *R. sp.*, *Rhinolophus* species; *R. sth.*, *Rhinolophus stheno*; BGR, Bulgaria; CHN, China; ITA, Italy; JPN, Japan; KEN, Kenya; KOR, Korea; RUS, Russia; RWA, Ruanda; SLO, Slovenia; SPA, Spain; THA, Thailand; UGA, Uganda.

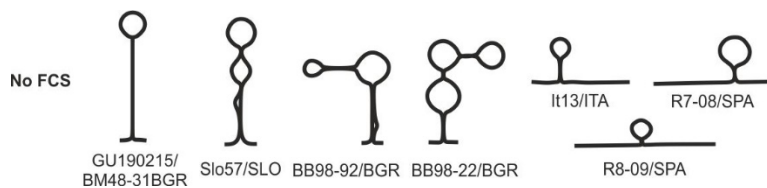

**Supplementary Figure 2.** Predicted RNA secondary structures of the polybasic cleavage site regions of *SrC* that are not predicted to acquire FCS through nucleotide substitutions or insertions.

**Supplementary table 1. Amino acid identities of a partial *RdRp* fragment of European bat coronaviruses and prototype betacoronaviruses for species delineation.**

| % amino acid sequence identity (range): |                               |                       |                     |
|-----------------------------------------|-------------------------------|-----------------------|---------------------|
| Within European bat CoVs                | European bat CoVs compared to |                       |                     |
|                                         | SARS-CoV (AY274119)           | SARS-CoV-2 (MT019529) | MERS-CoV (NC019843) |
| 97.8-100%                               | 97.4-99.3                     | 96.7-97.8             | 76.4-76.5           |

**Supplementary table 2.** FCS prediction in human coronaviruses and their ancestors

| Related HCoV | FCS region | Accession number | Prototype | Host category       | Order      | FCS        | ProP score |
|--------------|------------|------------------|-----------|---------------------|------------|------------|------------|
| 229E         | S2         | KT253272         |           | Evolutionary origin | Chiroptera | GSGRTGR SV | 0.675      |
| HKU1         | S1S2       | AC000192         |           | Evolutionary origin | Rodentia   | KSRRARR SV | 0.884      |
| HKU1         | S1S2       | FJ647219         |           | Evolutionary origin | Rodentia   | KSRRARR SV | 0.884      |
| HKU1         | S1S2       | FJ647220         |           | Evolutionary origin | Rodentia   | KSRRARR SV | 0.884      |
| HKU1         | S1S2       | FJ647221         |           | Evolutionary origin | Rodentia   | KSRRARR SV | 0.884      |
| HKU1         | S1S2       | FJ647224         |           | Evolutionary origin | Rodentia   | KSRRARR SV | 0.884      |
| HKU1         | S1S2       | FJ647226         |           | Evolutionary origin | Rodentia   | KSRRARR SV | 0.884      |

|      |      |           |           |                     |              |            |       |
|------|------|-----------|-----------|---------------------|--------------|------------|-------|
| HKU1 | S1S2 | JX169866  |           | Evolutionary origin | Rodentia     | KSRRARR SV | 0.884 |
| HKU1 | S1S2 | JX169867  |           | Evolutionary origin | Rodentia     | KSRRARR SV | 0.884 |
| HKU1 | S1S2 | MW620427  |           | Evolutionary origin | Rodentia     | KSRRARR SV | 0.884 |
| HKU1 | S1S2 | FJ938068  |           | Evolutionary origin | Rodentia     | TAHRARR SV | 0.881 |
| HKU1 | S1S2 | JF792617  |           | Evolutionary origin | Rodentia     | TAHRARR SV | 0.881 |
| HKU1 | S1S2 | NC012936  |           | Evolutionary origin | Rodentia     | TAHRARR SV | 0.881 |
| HKU1 | S1S2 | AB551247  |           | Evolutionary origin | Rodentia     | KARRARR SV | 0.875 |
| HKU1 | S1S2 | MF416379  |           | Evolutionary origin | Rodentia     | XAHRARR SV | 0.871 |
| HKU1 | S1S2 | JF792616  |           | Evolutionary origin | Rodentia     | IAHRARR SV | 0.867 |
| HKU1 | S1S2 | KF850449  |           | Evolutionary origin | Rodentia     | IAHRARR SV | 0.867 |
| HKU1 | S1S2 | FJ647223  |           | Evolutionary origin | Rodentia     | TSHRARR SI | 0.865 |
| HKU1 | S1S2 | MW773844  |           | Evolutionary origin | Rodentia     | TSHRARR SI | 0.865 |
| HKU1 | S1S2 | FJ647218  |           | Evolutionary origin | Rodentia     | KSRRADR SV | 0.808 |
| HKU1 | S1S2 | FJ647222  |           | Evolutionary origin | Rodentia     | KSRRADR SV | 0.808 |
| HKU1 | S1S2 | FJ647225  |           | Evolutionary origin | Rodentia     | KSRRADR SV | 0.808 |
| HKU1 | S1S2 | FJ647227  |           | Evolutionary origin | Rodentia     | KSRRADR SV | 0.808 |
| HKU1 | S1S2 | MF618252  |           | Evolutionary origin | Rodentia     | KSRRADR SV | 0.808 |
| HKU1 | S1S2 | FJ884687  |           | Evolutionary origin | Rodentia     | KSRRADR SV | 0.798 |
| HKU1 | S1S2 | NC001846  |           | Evolutionary origin | Rodentia     | KSRRADR SV | 0.798 |
| HKU1 | S1S2 | NC048217  |           | Evolutionary origin | Rodentia     | KSRRADR SV | 0.808 |
| HKU1 | S1S2 | NC006577  | HCoV-HKU1 |                     | Primates     | SSRRKRR SI | 0.877 |
| HKU1 | S1S2 | NC006577  | HCoV-HKU1 |                     | Primates     | SSRRKRR RS | 0.654 |
| MERS | S1S2 | MH002341  |           | Evolutionary origin | Chiroptera   | TSSRVRR AT | 0.853 |
| MERS | S1S2 | EF065509  |           | Evolutionary origin | Chiroptera   | TSSRVRR AT | 0.822 |
| MERS | S1S2 | NC_009020 |           | Evolutionary origin | Chiroptera   | TSSRVRR AT | 0.822 |
| MERS | S1S2 | KJ473820  |           | Evolutionary origin | Chiroptera   | TSSLRRR AT | 0.811 |
| MERS | S1S2 | MH002340  |           | Evolutionary origin | Chiroptera   | TPSRVLR AA | 0.746 |
| MERS | S1S2 | MH002342  |           | Evolutionary origin | Chiroptera   | PSARLAR SA | 0.701 |
| MERS | S1S2 | EF065510  |           | Evolutionary origin | Chiroptera   | TSTRFRR AT | 0.588 |
| MERS | S1S2 | EF065511  |           | Evolutionary origin | Chiroptera   | TSTRFRR AT | 0.588 |
| MERS | S1S2 | EF065512  |           | Evolutionary origin | Chiroptera   | TSTRFRR AT | 0.588 |
| MERS | S1S2 | KC869678  |           | Evolutionary origin | Chiroptera   | TNLRSGR ST | 0.572 |
| MERS | S1S2 | MF593268  |           | Evolutionary origin | Chiroptera   | TNLRSGR ST | 0.572 |
| MERS | S1S2 | MH002342  |           | Evolutionary origin | Chiroptera   | RLARSAR SG | 0.509 |
| MERS | S1S2 | MK967708  |           | Intermediate host   | Artiodactyla | LTPRSVR SV | 0.607 |
| MERS | S1S2 | KJ477103  |           | Intermediate host   | Artiodactyla | LTPRSVR SV | 0.563 |
| MERS | S1S2 | KU740200  |           | Intermediate host   | Artiodactyla | LTPRSVR SV | 0.563 |
| MERS | S1S2 | KY581695  |           | Intermediate host   | Artiodactyla | LTPRSVR SV | 0.563 |
| MERS | S1S2 | KY581696  |           | Intermediate host   | Artiodactyla | LTPRSVR SV | 0.563 |
| MERS | S1S2 | KY581697  |           | Intermediate host   | Artiodactyla | LTPRSVR SV | 0.563 |
| MERS | S1S2 | KY581698  |           | Intermediate host   | Artiodactyla | LTPRSVR SV | 0.563 |
| MERS | S1S2 | KY581699  |           | Intermediate host   | Artiodactyla | LTPRSVR SV | 0.563 |
| MERS | S1S2 | KY581700  |           | Intermediate host   | Artiodactyla | LTPRSVR SV | 0.563 |
| MERS | S1S2 | KY673149  |           | Intermediate host   | Artiodactyla | LTPRSVR SV | 0.563 |
| MERS | S1S2 | MF598594  |           | Intermediate host   | Artiodactyla | LTPRSVR SV | 0.563 |
| MERS | S1S2 | MF598595  |           | Intermediate host   | Artiodactyla | LTPRSVR SV | 0.563 |
| MERS | S1S2 | MF598596  |           | Intermediate host   | Artiodactyla | LTPRSVR SV | 0.563 |
| MERS | S1S2 | MF598597  |           | Intermediate host   | Artiodactyla | LTPRSVR SV | 0.563 |
| MERS | S1S2 | MF598598  |           | Intermediate host   | Artiodactyla | LTPRSVR SV | 0.563 |
| MERS | S1S2 | MF598599  |           | Intermediate host   | Artiodactyla | LTPRSVR SV | 0.563 |
| MERS | S1S2 | MF598600  |           | Intermediate host   | Artiodactyla | LTPRSVR SV | 0.563 |
| MERS | S1S2 | MF598601  |           | Intermediate host   | Artiodactyla | LTPRSVR SV | 0.563 |
| MERS | S1S2 | MF598602  |           | Intermediate host   | Artiodactyla | LTPRSVR SV | 0.563 |
| MERS | S1S2 | MF598603  |           | Intermediate host   | Artiodactyla | LTPRSVR SV | 0.563 |
| MERS | S1S2 | MF598604  |           | Intermediate host   | Artiodactyla | LTPRSVR SV | 0.563 |
| MERS | S1S2 | MF598605  |           | Intermediate host   | Artiodactyla | LTPRSVR SV | 0.563 |
| MERS | S1S2 | MF598606  |           | Intermediate host   | Artiodactyla | LTPRSVR SV | 0.563 |
| MERS | S1S2 | MF598607  |           | Intermediate host   | Artiodactyla | LTPRSVR SV | 0.563 |
| MERS | S1S2 | MF598608  |           | Intermediate host   | Artiodactyla | LTPRSVR SV | 0.563 |
| MERS | S1S2 | MF598609  |           | Intermediate host   | Artiodactyla | LTPRSVR SV | 0.563 |
| MERS | S1S2 | MF598610  |           | Intermediate host   | Artiodactyla | LTPRSVR SV | 0.563 |
| MERS | S1S2 | MF598611  |           | Intermediate host   | Artiodactyla | LTPRSVR SV | 0.563 |
| MERS | S1S2 | MF598612  |           | Intermediate host   | Artiodactyla | LTPRSVR SV | 0.563 |
| MERS | S1S2 | MF598613  |           | Intermediate host   | Artiodactyla | LTPRSVR SV | 0.563 |
| MERS | S1S2 | MF598614  |           | Intermediate host   | Artiodactyla | LTPRSVR SV | 0.563 |
| MERS | S1S2 | MF598615  |           | Intermediate host   | Artiodactyla | LTPRSVR SV | 0.563 |
| MERS | S1S2 | MF598616  |           | Intermediate host   | Artiodactyla | LTPRSVR SV | 0.563 |
| MERS | S1S2 | MF598617  |           | Intermediate host   | Artiodactyla | LTPRSVR SV | 0.563 |
| MERS | S1S2 | MF598618  |           | Intermediate host   | Artiodactyla | LTPRSVR SV | 0.563 |
| MERS | S1S2 | MF598619  |           | Intermediate host   | Artiodactyla | LTPRSVR SV | 0.563 |
| MERS | S1S2 | MF598620  |           | Intermediate host   | Artiodactyla | LTPRSVR SV | 0.563 |
| MERS | S1S2 | MF598621  |           | Intermediate host   | Artiodactyla | LTPRSVR SV | 0.563 |
| MERS | S1S2 | MF598622  |           | Intermediate host   | Artiodactyla | LTPRSVR SV | 0.563 |















|       |      |          |           |                     |              |             |       |
|-------|------|----------|-----------|---------------------|--------------|-------------|-------|
| MERS  | S2   | MT226605 |           | Intermediate host   | Artiodactyla | TGSR SAR SA | 0.707 |
| MERS  | S2   | MT226606 |           | Intermediate host   | Artiodactyla | TGSR SAR SA | 0.707 |
| MERS  | S2   | MT226607 |           | Intermediate host   | Artiodactyla | TGSR SAR SA | 0.707 |
| MERS  | S2   | MW086527 |           | Intermediate host   | Artiodactyla | TGSR SAR SA | 0.707 |
| MERS  | S2   | MW086528 |           | Intermediate host   | Artiodactyla | TGSR SAR SA | 0.707 |
| MERS  | S2   | MW086529 |           | Intermediate host   | Artiodactyla | TGSR SAR SA | 0.707 |
| MERS  | S2   | MW086530 |           | Intermediate host   | Artiodactyla | TGSR SAR SA | 0.707 |
| MERS  | S2   | MW086531 |           | Intermediate host   | Artiodactyla | TGSR SAR SA | 0.707 |
| MERS  | S2   | MW086532 |           | Intermediate host   | Artiodactyla | TGSR SAR SA | 0.707 |
| MERS  | S2   | MW086533 |           | Intermediate host   | Artiodactyla | TGSR SAR SA | 0.707 |
| MERS  | S2   | MW086534 |           | Intermediate host   | Artiodactyla | TGSR SAR SA | 0.707 |
| MERS  | S2   | MW086535 |           | Intermediate host   | Artiodactyla | TGSR SAR SA | 0.707 |
| MERS  | S2   | MW086538 |           | Intermediate host   | Artiodactyla | TGSR SAR SA | 0.707 |
| MERS  | S2   | MW086539 |           | Intermediate host   | Artiodactyla | TGSR SAR SA | 0.707 |
| MERS  | S2   | MW545527 |           | Intermediate host   | Artiodactyla | TGSR SAR SA | 0.707 |
| MERS  | S2   | MW545528 |           | Intermediate host   | Artiodactyla | TGSR SAR SA | 0.707 |
| MERS  | S2   | MH371127 | MERS-CoV  |                     | Primates     | TGSR SAR SA | 0.707 |
| MERS  | S2   | NC019843 | MERS-CoV  |                     | Primates     | TGSR SAR SA | 0.707 |
| MERS  | S2   | NC038294 | MERS-CoV  |                     | Primates     | TGSR SAR SA | 0.707 |
| NL63r | S2   | NC005831 | HCoV-NL63 |                     | Primates     | LPQR NIR SS | 0.519 |
| OC43  | S1S2 | KM349742 |           | Evolutionary origin | Rodentia     | STWR AKR DL | 0.749 |
| OC43  | S1S2 | KM349743 |           | Evolutionary origin | Rodentia     | STWR AKR DL | 0.749 |
| OC43  | S1S2 | KM349744 |           | Evolutionary origin | Rodentia     | STWR AKR DL | 0.749 |
| OC43  | S1S2 | MT820628 |           | Evolutionary origin | Rodentia     | ATRR AKR DL | 0.761 |
| OC43  | S1S2 | MT820629 |           | Evolutionary origin | Rodentia     | ATRR AKR DL | 0.761 |
| OC43  | S1S2 | MT820630 |           | Evolutionary origin | Rodentia     | ATRR SKR DL | 0.793 |
| OC43  | S1S2 | MT820631 |           | Evolutionary origin | Rodentia     | ATRR AKR DL | 0.761 |
| OC43  | S1S2 | NC026011 |           | Evolutionary origin | Rodentia     | STWR AKR DL | 0.749 |
| OC43  | S1S2 | AB354579 |           | Intermediate host   | Artiodactyla | TKRR SRR AI | 0.776 |
| OC43  | S1S2 | AF220295 |           | Intermediate host   | Artiodactyla | TKRR SRR AI | 0.776 |
| OC43  | S1S2 | AF391541 |           | Intermediate host   | Artiodactyla | TKRR SRR SI | 0.851 |
| OC43  | S1S2 | AF391542 |           | Intermediate host   | Artiodactyla | TKRR SRR SI | 0.851 |
| OC43  | S1S2 | DQ011855 |           | Intermediate host   | Artiodactyla | TALRSRR SF  | 0.715 |
| OC43  | S1S2 | DQ811784 |           | Intermediate host   | Artiodactyla | TKRR SRR SI | 0.851 |
| OC43  | S1S2 | DQ915164 |           | Intermediate host   | Artiodactyla | TKRR SRR SI | 0.851 |
| OC43  | S1S2 | EF424615 |           | Intermediate host   | Artiodactyla | TKRR SRR SI | 0.851 |
| OC43  | S1S2 | EF424617 |           | Intermediate host   | Artiodactyla | TKRR SRR SI | 0.851 |
| OC43  | S1S2 | EF424619 |           | Intermediate host   | Artiodactyla | TKRR SRR SI | 0.851 |
| OC43  | S1S2 | EF424620 |           | Intermediate host   | Artiodactyla | TKRR SRR SI | 0.851 |
| OC43  | S1S2 | EF424621 |           | Intermediate host   | Artiodactyla | TKRR SRR SI | 0.851 |
| OC43  | S1S2 | EF424622 |           | Intermediate host   | Artiodactyla | TKRR SRR SI | 0.851 |
| OC43  | S1S2 | EF424623 |           | Intermediate host   | Artiodactyla | TKRR SRR SI | 0.851 |
| OC43  | S1S2 | EF424624 |           | Intermediate host   | Artiodactyla | TKRR SRR SI | 0.851 |
| OC43  | S1S2 | FJ425184 |           | Intermediate host   | Artiodactyla | TKRR SRR SI | 0.851 |
| OC43  | S1S2 | FJ425185 |           | Intermediate host   | Artiodactyla | TKRR SRR SI | 0.851 |
| OC43  | S1S2 | FJ425186 |           | Intermediate host   | Artiodactyla | TKRR SRR SI | 0.851 |
| OC43  | S1S2 | FJ425187 |           | Intermediate host   | Artiodactyla | TKRR SRR SI | 0.851 |
| OC43  | S1S2 | FJ425188 |           | Intermediate host   | Artiodactyla | TKRR SRR SI | 0.851 |
| OC43  | S1S2 | FJ425189 |           | Intermediate host   | Artiodactyla | TKRR SRR SI | 0.851 |
| OC43  | S1S2 | FJ938063 |           | Intermediate host   | Artiodactyla | TKRR SRR SI | 0.851 |
| OC43  | S1S2 | FJ938064 |           | Intermediate host   | Artiodactyla | TKRR SRR SI | 0.851 |
| OC43  | S1S2 | FJ938065 |           | Intermediate host   | Artiodactyla | TKRR SRR SI | 0.851 |
| OC43  | S1S2 | FJ938066 |           | Intermediate host   | Artiodactyla | TKRR SRR SI | 0.851 |
| OC43  | S1S2 | KF906249 |           | Intermediate host   | Artiodactyla | IDRR SRR AI | 0.719 |
| OC43  | S1S2 | KF906250 |           | Intermediate host   | Artiodactyla | IDRR SRR AI | 0.719 |
| OC43  | S1S2 | KU558922 |           | Intermediate host   | Artiodactyla | IKRR SRR SI | 0.829 |
| OC43  | S1S2 | KU558923 |           | Intermediate host   | Artiodactyla | IKRR SRR SI | 0.829 |
| OC43  | S1S2 | KU886219 |           | Intermediate host   | Artiodactyla | TKRR SRR SI | 0.851 |
| OC43  | S1S2 | KX982264 |           | Intermediate host   | Artiodactyla | TKRR SRR AI | 0.776 |
| OC43  | S1S2 | KY419103 |           | Intermediate host   | Artiodactyla | TALRSRR SF  | 0.715 |
| OC43  | S1S2 | KY419104 |           | Intermediate host   | Artiodactyla | TALRSRR SF  | 0.715 |
| OC43  | S1S2 | KY419105 |           | Intermediate host   | Artiodactyla | TALRSRR SF  | 0.715 |
| OC43  | S1S2 | KY419106 |           | Intermediate host   | Artiodactyla | TSLSRR SL   | 0.759 |
| OC43  | S1S2 | KY419107 |           | Intermediate host   | Artiodactyla | TSLSRR SL   | 0.759 |
| OC43  | S1S2 | KY419109 |           | Intermediate host   | Artiodactyla | TSLSRR SL   | 0.759 |
| OC43  | S1S2 | KY419110 |           | Intermediate host   | Artiodactyla | TALRSRR SF  | 0.715 |
| OC43  | S1S2 | KY419112 |           | Intermediate host   | Artiodactyla | TALRSRR SF  | 0.715 |
| OC43  | S1S2 | KY419113 |           | Intermediate host   | Artiodactyla | TSLSRR SL   | 0.759 |
| OC43  | S1S2 | KY994645 |           | Intermediate host   | Artiodactyla | TALRSRR SF  | 0.715 |
| OC43  | S1S2 | LC494126 |           | Intermediate host   | Artiodactyla | TKRR SRR SI | 0.851 |
| OC43  | S1S2 | LC494127 |           | Intermediate host   | Artiodactyla | TKRR SRR SI | 0.851 |
| OC43  | S1S2 | LC494128 |           | Intermediate host   | Artiodactyla | TKRR SRR SI | 0.851 |
| OC43  | S1S2 | LC494129 |           | Intermediate host   | Artiodactyla | TKRR SRR SI | 0.851 |



|              |      |          |                        |                   |                |            |       |
|--------------|------|----------|------------------------|-------------------|----------------|------------|-------|
| OC43         | S1S2 | MH810163 |                        | Intermediate host | Artiodactyla   | TKRRSRR AI | 0.813 |
| OC43         | S1S2 | MN514962 |                        | Intermediate host | Artiodactyla   | KERRSRR AI | 0.728 |
| OC43         | S1S2 | MN514963 |                        | Intermediate host | Artiodactyla   | TDRRSRR AV | 0.812 |
| OC43         | S1S2 | MN514964 |                        | Intermediate host | Artiodactyla   | TDRRSRR AI | 0.752 |
| OC43         | S1S2 | MN514965 |                        | Intermediate host | Artiodactyla   | TDRRXRR AI | 0.738 |
| OC43         | S1S2 | MN514966 |                        | Intermediate host | Artiodactyla   | TDRRSRR AV | 0.814 |
| OC43         | S1S2 | MN514967 |                        | Intermediate host | Artiodactyla   | TDRRSRR AI | 0.752 |
| OC43         | S1S2 | MN982198 |                        | Intermediate host | Artiodactyla   | TKRRSRR SI | 0.851 |
| OC43         | S1S2 | MN982199 |                        | Intermediate host | Artiodactyla   | TKRRSRR SI | 0.851 |
| OC43         | S1S2 | MW165134 |                        | Intermediate host | Artiodactyla   | TALRSRR SF | 0.715 |
| OC43         | S1S2 | MW711287 |                        | Intermediate host | Artiodactyla   | TKRRSRR SI | 0.851 |
| OC43         | S1S2 | NC003045 |                        | Intermediate host | Artiodactyla   | TKRRSRR SI | 0.851 |
| OC43         | S1S2 | U00735   |                        | Intermediate host | Artiodactyla   | TKRRSRR AI | 0.776 |
| OC43         | S1S2 | JX860640 |                        | Intermediate host | Carnivora      | TKRRSRR SI | 0.851 |
| OC43         | S1S2 | KX432213 |                        | Intermediate host | Carnivora      | TKRRSRR SI | 0.851 |
| OC43         | S1S2 | NC017083 |                        | Intermediate host | Lagomorpha     | TQLRSRR AI | 0.627 |
| OC43         | S1S2 | EF446615 |                        | Intermediate host | Perissodactyla | TARRQRR SP | 0.819 |
| OC43         | S1S2 | LC061272 |                        | Intermediate host | Perissodactyla | IARRQRR SP | 0.795 |
| OC43         | S1S2 | LC061273 |                        | Intermediate host | Perissodactyla | TARRQRR SP | 0.819 |
| OC43         | S1S2 | LC061274 |                        | Intermediate host | Perissodactyla | TARRQRR SP | 0.819 |
| OC43         | S1S2 | LC592689 |                        | Intermediate host | Perissodactyla | TARRQRR SP | 0.819 |
| OC43         | S1S2 | FJ415324 | Human enteric CoV 4408 |                   | Primates       | TKRRSRR AI | 0.776 |
| OC43         | S1S2 | FJ938067 | Human enteric CoV 4408 |                   | Primates       | TKRRSRR AI | 0.776 |
| OC43         | S1S2 | MH685718 | HCoV-OC43              |                   | Primates       | KNRRSRR AI | 0.751 |
| OC43         | S1S2 | NC006213 | HCoV-OC43              |                   | Primates       | SKNRRSR GA | 0.529 |
| SARS-related | S1S2 | MT019529 | SARS-CoV-2             |                   | Primates       | NSPRRAR SV | 0.620 |

Accession numbers of viruses tested in ProP:

HCoV-229E: 41 Sequences (Hosts: 1 Primate, 6 Chiroptera, 34 Artiodactyla); JQ410000, KT253269, KT253270, KT253271, KT253272, KT253324, KT253325, KT253326, KT253327, KT253328, KT368892, KT368893, KT368894, KT368895, KT368896, KT368897, KT368898, KT368899, KT368900, KT368901, KT368902, KT368903, KT368904, KT368905, KT368906, KT368907, KT368908, KT368909, KT368910, KT368911, KT368912, KT368913, KT368914, KT368915, KT368916, KU291449, KY073747, KY073748, MF593473, NC002645, NC028752

MERS-CoV: 276 Sequences (Hosts: 3 Primates, 241 Artiodactyla, 29 Chiroptera, 3 Eulipotyphla); DQ648794, EF065505, EF065506, EF065507, EF065508, EF065509, EF065510, EF065511, EF065512, KC545386, KC869678, KJ473820, KJ473821, KJ473822, KJ477103, KU740200, KY581695, KY581696, KY581697, KY581698, KY581699, KY581700, KY673149, MF593268, MF598594, MF598595, MF598596, MF598597, MF598598, MF598599, MF598600, MF598601, MF598602, MF598603, MF598604, MF598605, MF598606, MF598607, MF598608, MF598609, MF598610, MF598611, MF598612, MF598613, MF598614, MF598615, MF598616, MF598617,

MF598618, MF598619, MF598620, MF598621, MF598622, MF598623, MF598624, MF598625,  
MF598626, MF598627, MF598628, MF598629, MF598630, MF598631, MF598632, MF598633,  
MF598634, MF598635, MF598636, MF598637, MF598638, MF598639, MF598640, MF598641,  
MF598642, MF598643, MF598644, MF598645, MF598646, MF598647, MF598648, MF598649,  
MF598650, MF598651, MF598652, MF598653, MF598654, MF598655, MF598656, MF598657,  
MF598658, MF598659, MF598660, MF598661, MF598662, MF598663, MF598664, MF598665,  
MF598666, MF598667, MF598668, MF598669, MF598670, MF598671, MF598672, MF598673,  
MF598674, MF598675, MF598676, MF598677, MF598678, MF598679, MF598680, MF598681,  
MF598682, MF598683, MF598684, MF598685, MF598686, MF598687, MF598688, MF598689,  
MF598690, MF598691, MF598692, MF598693, MF598694, MF598695, MF598696, MF598697,  
MF598698, MF598699, MF598700, MF598701, MF598702, MF598703, MF598704, MF598705,  
MF598706, MF598707, MF598708, MF598709, MF598710, MF598711, MF598712, MF598713,  
MF598714, MF598715, MF598716, MF598717, MF598718, MF598719, MF598720, MF598721,  
MF598722, MG021451, MG021452, MG596802, MG596803, MG923466, MG923467, MG923468,  
MG923469, MG923470, MG923471, MG923472, MG923473, MG923474, MG923475, MG923476,  
MG923477, MG923478, MG923479, MG923480, MG923481, MG987420, MG987421, MH002337,  
MH002338, MH002339, MH002340, MH002341, MH002342, MH259485, MH259486, MH371127,  
MH734114, MH734115, MK357908, MK357909, MK564474, MK564475, MK679660, MK967708,  
MN654970, MN654971, MN654972, MN654973, MN654974, MN654975, MN654976, MN654977,  
MN654978, MN654979, MN654980, MN654981, MN654982, MN654983, MN654984, MN654985,  
MN654986, MN654987, MN654988, MN654989, MN654990, MN654991, MN654992, MN654993,  
MN654994, MN654995, MN654996, MN654997, MN654998, MN654999, MN655000, MN655001,  
MN655002, MN655003, MN655004, MN655005, MN655006, MN655007, MN655008, MN655009,  
MN655010, MN655011, MN655012, MN655013, MN655014, MN655015, MN655016, MN655017,  
MN758606, MN758607, MN758608, MN758609, MN758610, MN758611, MN758612, MN758613,  
MN758614, MT226600, MT226601, MT226602, MT226603, MT226604, MT226605, MT226606,  
MT226607, MW086527, MW086528, MW086529, MW086530, MW086531, MW086532,

MW086533, MW086534, MW086535, MW086538, MW086539, MW218395, MW545527, MW545528, NC009019, NC009020, NC019843, NC038294, NC039207

HCoV-NL63: 6 Sequences (Hosts: 1 Primate, 5 Chiroptera); KY073744, KY073745, KY073746, NC32107, NC48216, NC5831

HCoV-OC43: 151 sequences (Hosts: 4 Primates, 131 Artiodactyla, 8 Rodentia, 5 Perissodactyla, 2 Carnivora, 1 Lagomorpha); AB354579, AF220295, AF391541, AF391542, DQ011855, DQ811784, DQ915164, EF424615, EF424617, EF424619, EF424620, EF424621, EF424622, EF424623, EF424624, EF446615, FJ415324, FJ425184, FJ425185, FJ425186, FJ425187, FJ425188, FJ425189, FJ938063, FJ938064, FJ938065, FJ938066, FJ938067, JX860640, KF906249, KF906250, KM349742, KM349743, KM349744, KU558922, KU558923, KU886219, KX432213, KX982264, KY419103, KY419104, KY419105, KY419106, KY419107, KY419109, KY419110, KY419112, KY419113, KY994645, LC061272, LC061273, LC061274, LC494126, LC494127, LC494128, LC494129, LC494130, LC494131, LC494132, LC494133, LC494134, LC494135, LC494136, LC494137, LC494138, LC494139, LC494140, LC494141, LC494142, LC494143, LC494144, LC494145, LC494147, LC494148, LC494149, LC494150, LC494151, LC494152, LC494153, LC494154, LC494155, LC494156, LC494157, LC494158, LC494159, LC494160, LC494161, LC494162, LC494163, LC494164, LC494165, LC494166, LC494167, LC494168, LC494169, LC494170, LC494171, LC494172, LC494173, LC494174, LC494175, LC494176, LC494177, LC494178, LC494179, LC494180, LC494181, LC494182, LC494183, LC494184, LC494185, LC494186, LC494187, LC494188, LC494189, LC494190, LC494191, LC494192, LC592689, MF083115, MG518518, MG757138, MG757139, MG757140, MG757141, MG757142, MH043952, MH043953, MH043954, MH043955, MH685718, MH810163, MN514962, MN514963, MN514964, MN514965, MN514966, MN514967, MN982198, MN982199, MT820628, MT820629, MT820630, MT820631, MW165134, MW711287, NC026011, NC0003045, NC006213, NC017083, U00735

HCoV-HKU1: 31 sequences (Hosts: 1 Primate, 30 Rodentia); AB551247, AC000192, AF201929, FJ647218, FJ647219, FJ647220, FJ647221, FJ647222, FJ647223, FJ647224, FJ647225, FJ647226, FJ647227, FJ884687, FJ938068, GU593319, JF792616, JF792617, JQ173883, JX169866, JX169867,

KF850449, MF416379, MF618252, MF618253, MW620427, MW773844, NC001846, NC006577, NC012936, NC048217

SARS-related CoV: 82 sequences (Hosts: 2 Primates, 62 Chiroptera, 12 Carnivora, 6 Pholidota);  
AY304486, AY304488, AY545914, AY545915, AY545916, AY545917, AY545918, AY545919, AY572034, AY572035, AY572038, DQ071615, DQ412042, DQ412043, DQ648856, DQ648857, FJ588686, FJ959407, GU190215, JX993987, JX993988, KC881005, KC881006, KF294457, KF367457, KF569996, KJ473811, KJ473812, KJ473813, KJ473814, KJ473815, KJ473816, KP886808, KP886809, KT444582, KU182964, KY352407, KY417142, KY417143, KY417144, KY417145, KY417146, KY417147, KY417148, KY417149, KY417150, KY417151, KY417152, KY770858, KY770859, KY770860, KY938558, LC556375, MG772933, MG772934, MK211374, MK211375, MK211376, MK211377, MK211378, MN996532, MT019529, MT040333, MT040334, MT040335, MT040336, MT072864, MT121216, MT726043, MT726045, MW251308, MW703458, MZ081376, MZ081377, MZ081378, MZ081379, MZ081380, MZ081381, MZ081382, MZ190137, MZ190138, NC004718
